# Supplementary material for: Ionising Radiation Immediately Impairs Synaptic Plasticity-Associated Cytoskeletal Signalling Pathways in HT22 Cells and in Mouse Brain: An In Vitro/In Vivo Comparison Study
Source: PubMed Central journal article supplement (PMC4203799; doi:10.1371/journal.pone.0110464), 2014-10-20

# SI Figure S1

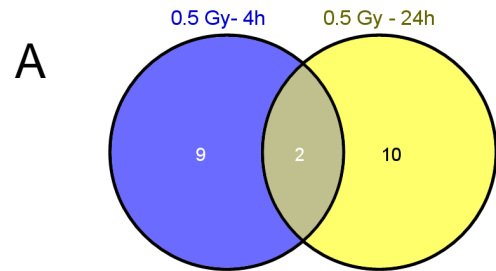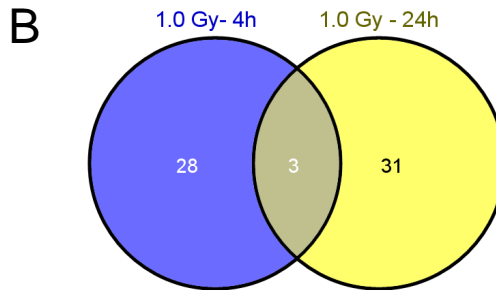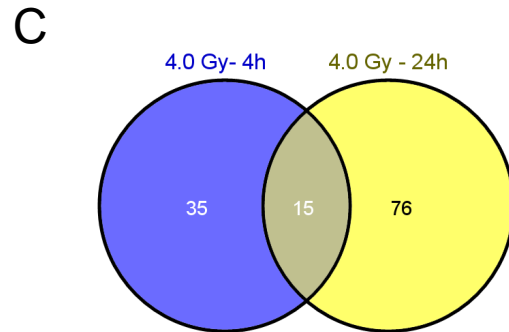

**D**

| Accession number   | Symbol | Name                                       | 0.5 Gy - 4h | Variability [%] | 0.5 Gy - 24h | Variability [%] |
|--------------------|--------|--------------------------------------------|-------------|-----------------|--------------|-----------------|
| ENSMUSP00000029405 | Gmps   | guanine monophosphate synthetase           | 1.65        | 14.9            | 1.49         | 13.5            |
| ENSMUSP00000048425 | Pebp1  | phosphatidylethanolamine binding protein 1 | 1.36        | 27.8            | 1.35         | 28.3            |

**E**

| Accession number   | Symbol | Name                                             | 1.0 Gy - 4h | Variability [%] | 1.0 Gy - 24h | Variability [%] |
|--------------------|--------|--------------------------------------------------|-------------|-----------------|--------------|-----------------|
| ENSMUSP00000016703 | H3f3b  | H3 histone, family 3B                            | 3.63        | 10.2            | 2.16         | 27.5            |
| ENSMUSP00000029405 | Gmps   | guanine monophosphate synthetase                 | 2.51        | 20.4            | 1.73         | 13.5            |
| ENSMUSP00000023235 | Eef1d  | eukaryotic translation elongation factor 1 delta | 2.10        | 26.7            | 1.90         | 23.4            |

**F**

| Accession number    | Symbol   | Name                                                                                        | 4.0 Gy - 4h | Variability [%] | 4.0 Gy - 24h | Variability [%] |
|---------------------|----------|---------------------------------------------------------------------------------------------|-------------|-----------------|--------------|-----------------|
| ENSMUSP000000130479 | Gspt1    | G1 to S phase transition 1                                                                  | 1.65        | 13.4            | 1.43         | 12.5            |
| ENSMUSP000000128967 | Immt     | inner membrane protein, mitochondrial                                                       | 1.52        | 28.1            | 1.31         | 20.6            |
| ENSMUSP000000126790 | Mcm4     | minichromosome maintenance deficient 4 homolog                                              | 1.40        | 27.0            | 1.39         | 6.9             |
| ENSMUSP000000103365 | Rpl18    | ribosomal protein L18                                                                       | -1.31       | 9.6             | -1.32        | 8.3             |
| ENSMUSP00000008812  | Rps18    | ribosomal protein S18                                                                       | -1.32       | 8.4             | -1.34        | 2.0             |
| ENSMUSP00000000756  | Rpl13    | ribosomal protein L13                                                                       | -1.33       | 11.9            | -1.37        | 7.6             |
| ENSMUSP000000100998 | Rps15    | ribosomal protein S15                                                                       | -1.34       | 16.4            | -1.44        | 1.1             |
| ENSMUSP00000016463  | Slc25a5  | solute carrier family 25 (mitochondrial carrier, adenine nucleotide translocator), member 5 | -1.37       | 8.3             | -1.47        | 22.3            |
| ENSMUSP00000079180  | Rps25    | ribosomal protein S25                                                                       | -1.40       | 22.8            | -1.41        | 2.2             |
| ENSMUSP00000079356  | Hist1h1b | histone cluster 1, H1b                                                                      | -1.40       | 3.7             | -1.60        | 3.8             |
| ENSMUSP00000063714  | Arhgdia  | Rho GDP dissociation inhibitor (GDI) alpha                                                  | -1.51       | 6.7             | -1.39        | 6.6             |
| ENSMUSP000000114135 | Rpl24    | ribosomal protein L24                                                                       | -1.56       | 12.0            | -1.52        | 8.9             |
| ENSMUSP00000027127  | Sf3b1    | splicing factor 3b, subunit                                                                 | -1.59       | 26.5            | -1.31        | 22.1            |
| ENSMUSP000000131489 | Rpl14    | ribosomal protein L14                                                                       | -1.60       | 18.3            | -1.52        | 3.4             |
| ENSMUSP00000031617  | Rpl6     | ribosomal protein L6                                                                        | -1.65       | 26.1            | -1.41        | 3.3             |

# SI Figure S2

## RhoGDI signalling

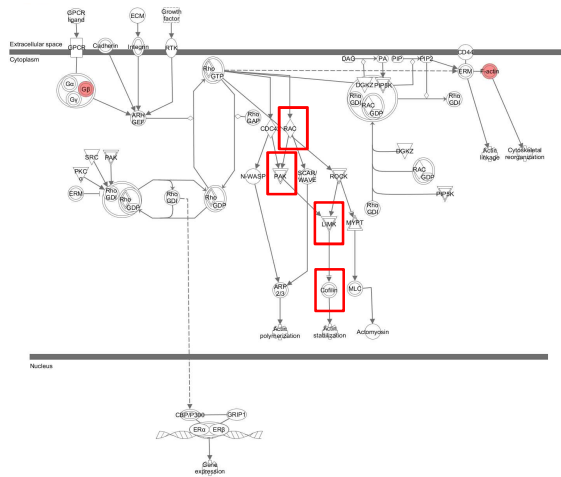

## Regulation of Actin-based Motility by Rho

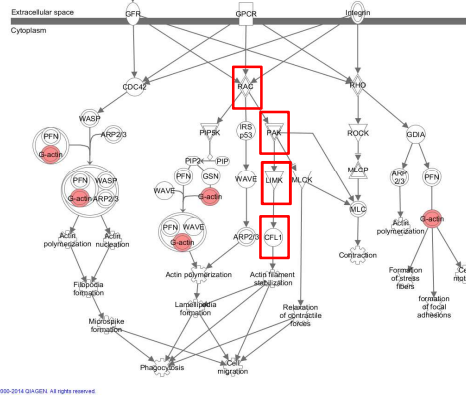

## Regulation by Rho Family GTPases

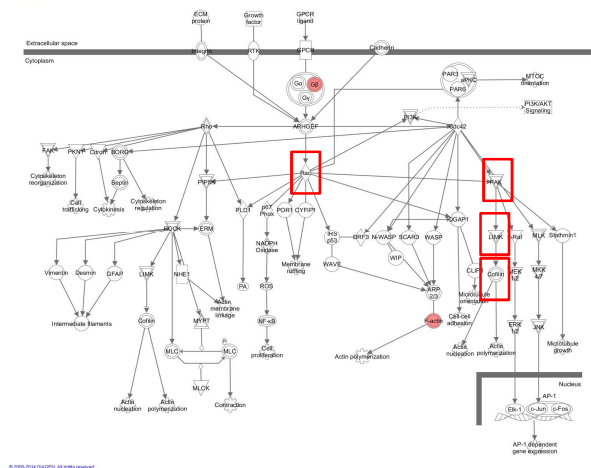

## Actin Cytoskeleton Signalling

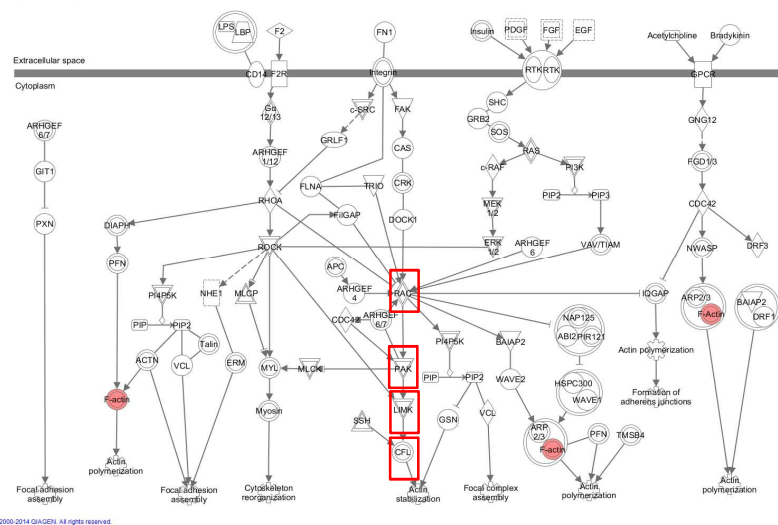

| Signalling pathway                        | Overlapping proteins    |
|-------------------------------------------|-------------------------|
| RhoGDI Signalling                         | Rac, PAK, LIMK, Cofilin |
| Actin Cytoskeleton Signalling             |                         |
| Regulation of Actin-based Motility by Rho |                         |
| Signalling by Rho Family GTPases          |                         |

## SI Figure S3

| Accession number   | Symbol | Name                                                   | 1.0 Gy - Hippocampus | Variability [%] | 1.0 Gy - Cortex | Variability [%] |
|--------------------|--------|--------------------------------------------------------|----------------------|-----------------|-----------------|-----------------|
| ENSMUSP00000007130 | Ctnnb1 | catenin (cadherin associated protein), beta 1          | 3.18                 | 24.9            | 1.65            | 19.7            |
| ENSMUSP00000111516 | Cdh2   | cadherin 2                                             | 3.06                 | 29.1            | 2.15            | 23.8            |
| ENSMUSP00000066304 | Nlgn3  | neuroligin 3                                           | 2.68                 | 28.9            | 1.98            | 27.3            |
| ENSMUSP00000126883 | Ank2   | ankyrin 2, brain                                       | 2.67                 | 25.9            | 1.77            | 8.4             |
| ENSMUSP00000026743 | Uqcrc1 | ubiquinol-cytochrome c reductase core protein 1        | 2.47                 | 19.1            | 2.12            | 18.5            |
| ENSMUSP00000029405 | Gmps   | guanine monophosphate synthetase                       | 1.96                 | 22.9            | 1.77            | 26.1            |
| ENSMUSP00000092658 | Rab7   | RAB7, member RAS oncogene family                       | 1.48                 | 10.6            | 1.41            | 13.9            |
| ENSMUSP00000030940 | Gnb1   | guanine nucleotide binding protein (G protein), beta 1 | 1.39                 | 2.5             | 1.32            | 27.1            |

# SI Figure S4

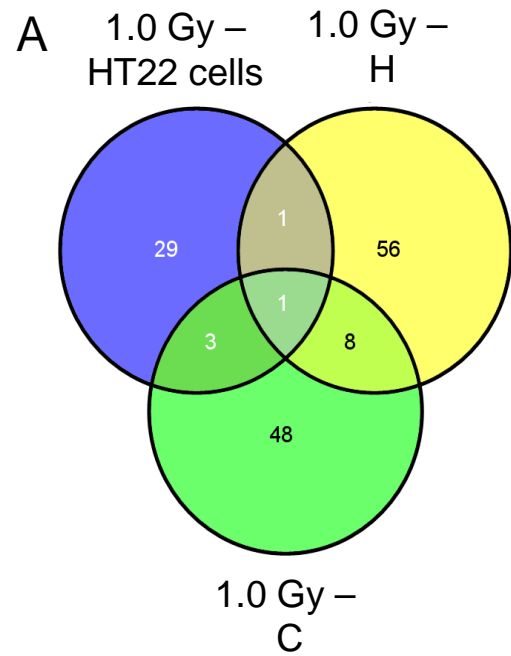

B

| Symbol | Name                             | 1.0 Gy - Hippocampus | Variability [%] | 1.0 Gy - Cortex | Variability [%] | 1.0 Gy - HT22 cells | Variability [%] |
|--------|----------------------------------|----------------------|-----------------|-----------------|-----------------|---------------------|-----------------|
| Gmps   | guanine monophosphate synthetase | 1.96                 | 22.9            | 1.77            | 26.1            | 1.73                | 13.5            |

# SI Figure S5

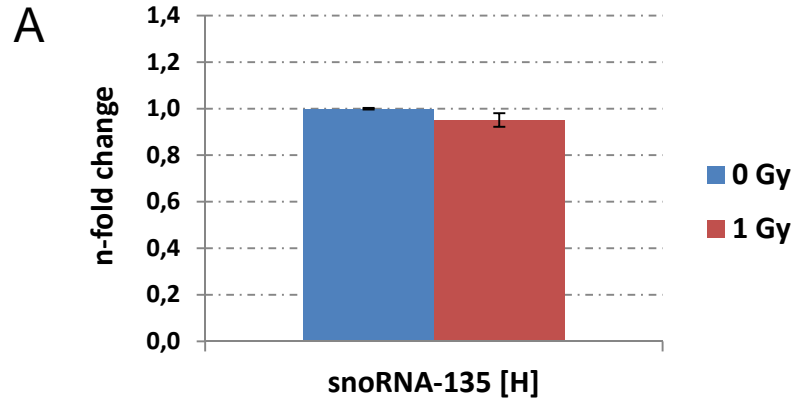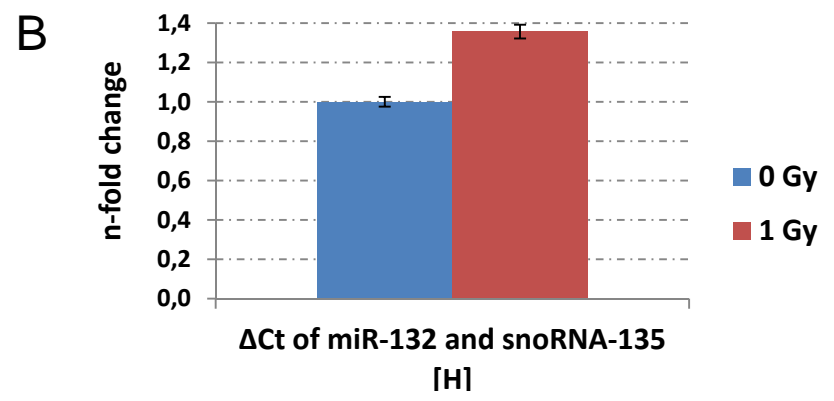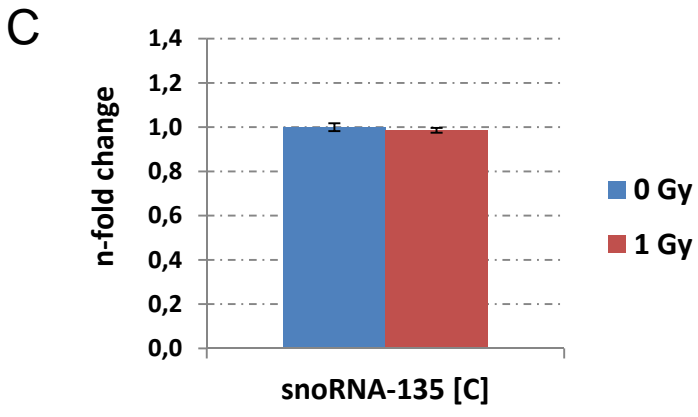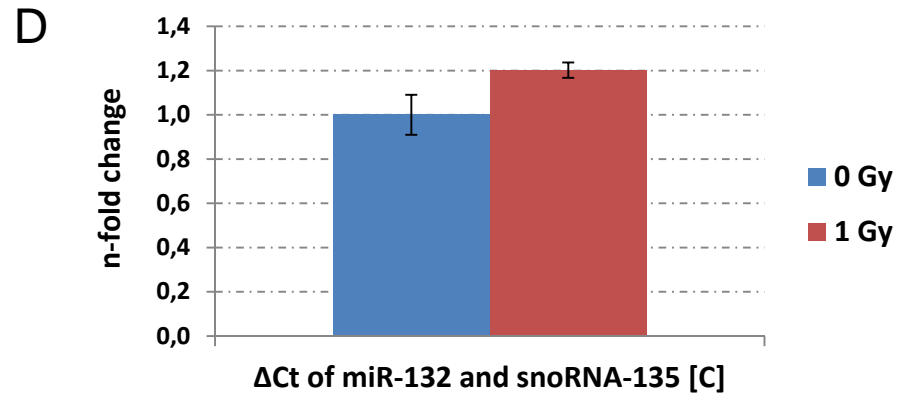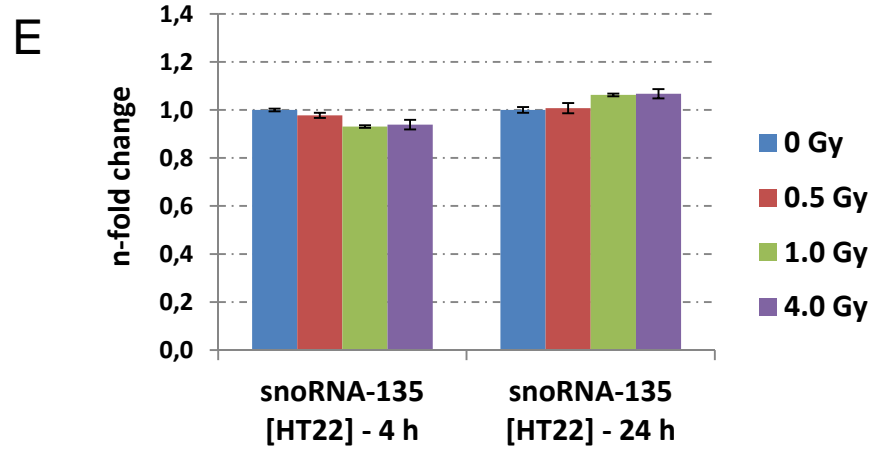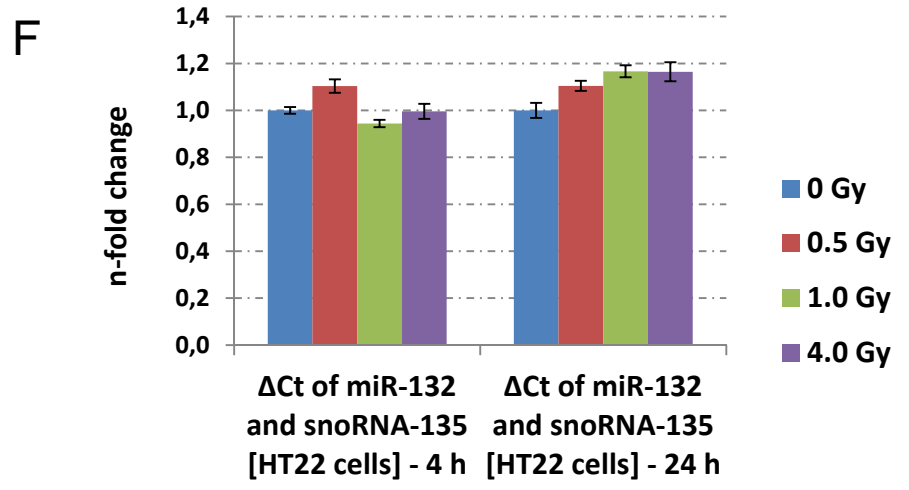

Supplement: pone.0110464.s001.pdf [file pone.0110464.s001.pdf]
